# Supplementary material for: A single class of ARF GTPase activated by several pathway-specific ARF-GEFs regulates essential membrane traffic in Arabidopsis
Source: PubMed Central journal article supplement (PMC6264874; doi:10.1371/journal.pgen.1007795), 2018-11-15
Supplement: pgen.1007795.s005.pdf [file pgen.1007795.s005.pdf]

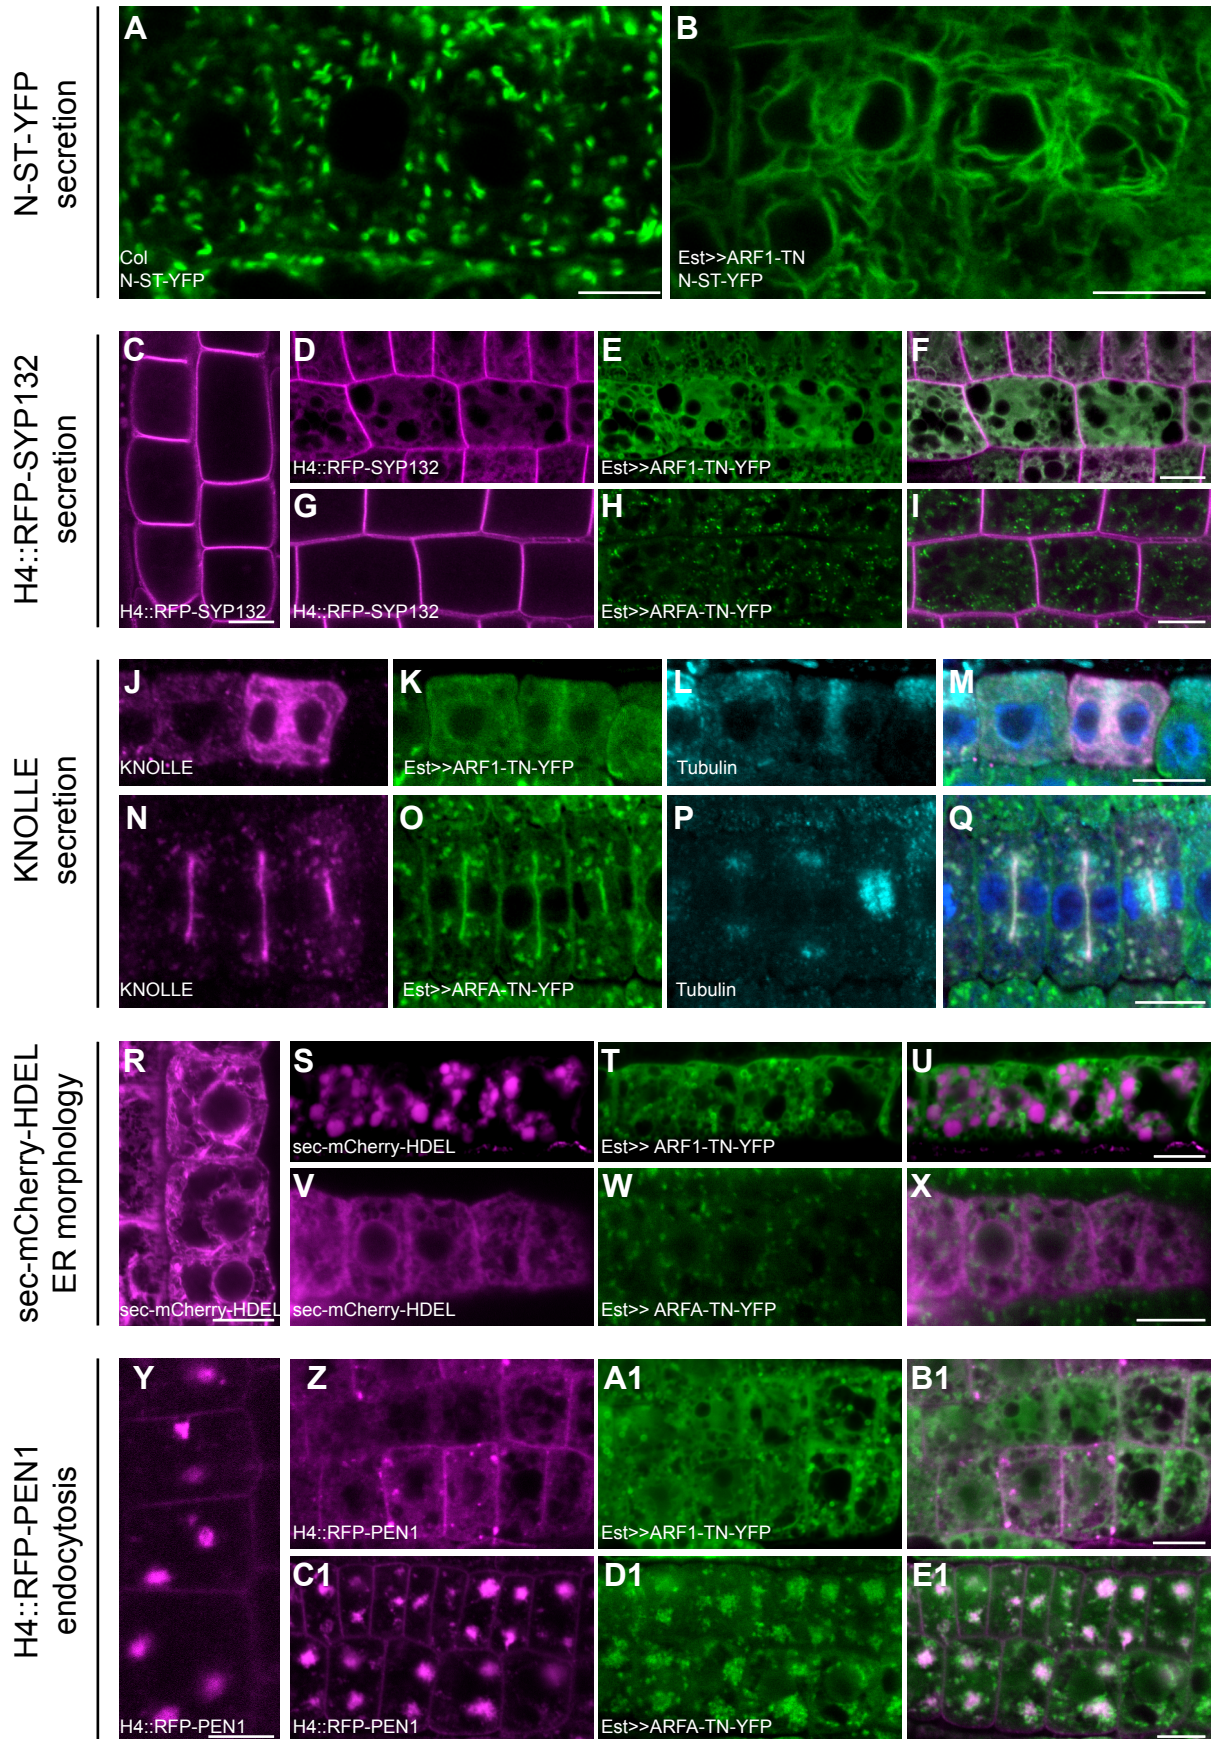

Supplementary Figure S5
